# Supplementary material for: Trends in the Use of Promotional Language (Hype) in Abstracts of Successful National Institutes of Health Grant Applications, 1985-2020
Source: PubMed Central journal article supplement (PMC9412227; doi:10.1001/jamanetworkopen.2022.28676), 2022-08-25
Supplement: jamanetwopen-e2228676-s001.pdf [file jamanetwopen-e2228676-s001.pdf]

## Supplementary Online Content

Millar N, Batalo B, Budgell B. Trends in the use of promotional language (hype) in abstracts of successful National Institutes of Health grant applications, 1985-2020. *JAMA Netw Open.* 2022;5(8):e2228676.

doi:10.1001/jamanetworkopen.2022.28676

**eTable.** Frequency in and Change of 139 Hype Adjectives Between 1985 and 2020

**eFigure.** Yearly Frequencies for All Hype Adjectives From 1985 to 2020 in Words per Million (wpm)

This supplementary material has been provided by the authors to give readers additional information about their work.

**eTable.** Frequency in and Change of 139 Hype Adjectives Between 1985 and 2020

| Adjective             | Adjective frequency |       | Overall change |          |
|-----------------------|---------------------|-------|----------------|----------|
|                       | 1985                | 2020  | absolute       | relative |
| novel                 | 1056                | 12809 | +1054 wpm      | +717%    |
| critical              | 1147                | 7623  | +555 wpm       | +348%    |
| key                   | 742                 | 6013  | +461 wpm       | +446%    |
| innovative            | 137                 | 4368  | +391 wpm       | +2048%   |
| scientific            | 581                 | 4422  | +334 wpm       | +413%    |
| effective             | 1674                | 5836  | +314 wpm       | +135%    |
| successful            | 743                 | 3966  | +269 wpm       | +260%    |
| diverse               | 388                 | 3333  | +259 wpm       | +479%    |
| significant           | 1974                | 5600  | +250 wpm       | +91%     |
| advanced              | 290                 | 2383  | +183 wpm       | +454%    |
| robust                | 35                  | 1948  | +178 wpm       | +3652%   |
| relevant              | 1246                | 3694  | +173 wpm       | +100%    |
| strong                | 441                 | 2451  | +168 wpm       | +275%    |
| unique                | 1750                | 4199  | +150 wpm       | +62%     |
| comprehensive         | 626                 | 2330  | +131 wpm       | +151%    |
| broad                 | 595                 | 1900  | +95 wpm        | +115%    |
| essential             | 1411                | 3081  | +93 wpm        | +47%     |
| rigorous              | 105                 | 1092  | +88 wpm        | +601%    |
| promising             | 265                 | 1318  | +87 wpm        | +235%    |
| interdisciplinary     | 231                 | 1188  | +79 wpm        | +247%    |
| urgent                | 16                  | 816   | +74 wpm        | +3332%   |
| quality               | 149                 | 989   | +72 wpm        | +347%    |
| first                 | 3175                | 5440  | +68 wpm        | +15%     |
| unmet                 | 6                   | 729   | +68 wpm        | +8039%   |
| outstanding           | 55                  | 764   | +64 wpm        | +837%    |
| efficient             | 474                 | 1385  | +64 wpm        | +97%     |
| substantial           | 321                 | 1156  | +64 wpm        | +143%    |
| multidisciplinary     | 478                 | 1341  | +59 wpm        | +89%     |
| crucial               | 347                 | 1105  | +55 wpm        | +115%    |
| strategic             | 37                  | 625   | +53 wpm        | +1038%   |
| unprecedented         | 31                  | 606   | +53 wpm        | +1219%   |
| fundamental           | 1072                | 2130  | +51 wpm        | +34%     |
| timely                | 64                  | 628   | +50 wpm        | +561%    |
| scalable <sup>a</sup> | 0                   | 476   | +45 wpm        | +13029%  |
| largest               | 91                  | 610   | +45 wpm        | +352%    |
| powerful              | 315                 | 940   | +44 wpm        | +101%    |
| extensive             | 763                 | 1597  | +44 wpm        | +41%     |
| top                   | 25                  | 490   | +42 wpm        | +1221%   |
| international         | 124                 | 631   | +42 wpm        | +243%    |
| exciting              | 62                  | 536   | +42 wpm        | +483%    |
| devastating           | 30                  | 466   | +40 wpm        | +946%    |
| senior                | 64                  | 508   | +39 wpm        | +435%    |

|                                |     |     |         |         |
|--------------------------------|-----|-----|---------|---------|
| ideal                          | 179 | 661 | +37 wpm | +149%   |
| sustainable                    | 1   | 377 | +35 wpm | +25157% |
| accessible                     | 194 | 660 | +35 wpm | +129%   |
| rich                           | 260 | 750 | +34 wpm | +94%    |
| accurate                       | 434 | 995 | +33 wpm | +55%    |
| exceptional                    | 17  | 372 | +33 wpm | +1372%  |
| emerging                       | 13  | 335 | +30 wpm | +1636%  |
| vast                           | 63  | 404 | +29 wpm | +332%   |
| intellectual                   | 95  | 448 | +29 wpm | +218%   |
| productive                     | 132 | 500 | +29 wpm | +155%   |
| meaningful                     | 114 | 450 | +26 wpm | +166%   |
| compelling                     | 35  | 326 | +26 wpm | +528%   |
| transformative <sup>a</sup>    | 0   | 274 | +26 wpm | +8190%  |
| efficacious                    | 78  | 386 | +25 wpm | +233%   |
| foundational                   | 0   | 263 | +25 wpm | +6226%  |
| synergistic                    | 123 | 443 | +24 wpm | +143%   |
| transdisciplinary <sup>a</sup> | 0   | 255 | +24 wpm | +7616%  |
| ready                          | 53  | 333 | +24 wpm | +323%   |
| easy                           | 67  | 352 | +24 wpm | +254%   |
| qualified                      | 54  | 331 | +24 wpm | +313%   |
| durable                        | 6   | 253 | +23 wpm | +2725%  |
| actionable <sup>a</sup>        | 0   | 242 | +23 wpm | +16114% |
| elusive                        | 25  | 279 | +23 wpm | +652%   |
| impactful <sup>a</sup>         | 0   | 238 | +22 wpm | +6465%  |
| deeper                         | 47  | 301 | +22 wpm | +332%   |
| vital                          | 222 | 543 | +20 wpm | +65%    |
| tremendous                     | 28  | 254 | +20 wpm | +511%   |
| greatest                       | 103 | 358 | +19 wpm | +134%   |
| latest                         | 33  | 243 | +18 wpm | +397%   |
| enormous                       | 42  | 255 | +18 wpm | +309%   |
| sophisticated                  | 131 | 377 | +17 wpm | +94%    |
| pivotal                        | 62  | 266 | +16 wpm | +189%   |
| imperative                     | 32  | 212 | +15 wpm | +347%   |
| reproducible                   | 114 | 318 | +14 wpm | +88%    |
| generalizable                  | 16  | 166 | +13 wpm | +598%   |
| experienced                    | 36  | 194 | +13 wpm | +263%   |
| longstanding                   | 14  | 159 | +13 wpm | +665%   |
| unparalleled                   | 6   | 142 | +12 wpm | +1486%  |
| user-friendly                  | 15  | 154 | +12 wpm | +591%   |
| attractive                     | 88  | 259 | +12 wpm | +98%    |
| talented                       | 5   | 129 | +11 wpm | +1629%  |
| invaluable                     | 43  | 185 | +11 wpm | +190%   |
| remarkable                     | 80  | 229 | +10 wpm | +93%    |
| safer                          | 49  | 183 | +10 wpm | +152%   |
| skilled                        | 31  | 152 | +10 wpm | +231%   |
| massive                        | 66  | 204 | +10 wpm | +108%   |

|                                |     |     |         |        |
|--------------------------------|-----|-----|---------|--------|
| seamless                       | 1   | 100 | +9 wpm  | +6600% |
| unanswered                     | 46  | 161 | +9 wpm  | +136%  |
| notable                        | 19  | 110 | +8 wpm  | +291%  |
| vibrant <sup>a</sup>           | 0   | 77  | +7 wpm  | +903%  |
| huge                           | 6   | 85  | +7 wpm  | +849%  |
| intriguing                     | 4   | 81  | +7 wpm  | +145%  |
| alarming                       | 35  | 127 | +7 wpm  | +1257% |
| creative                       | 9   | 84  | +7 wpm  | +530%  |
| motivated                      | 24  | 104 | +6 wpm  | +192%  |
| paramount                      | 16  | 92  | +6 wpm  | +287%  |
| renowned <sup>a</sup>          | 0   | 68  | +6 wpm  | +1776% |
| surprising                     | 30  | 112 | +6 wpm  | +151%  |
| indispensable                  | 10  | 82  | +6 wpm  | +453%  |
| myriad                         | 4   | 72  | +6 wpm  | +1105% |
| tailored                       | 1   | 64  | +6 wpm  | +4186% |
| ample                          | 16  | 85  | +6 wpm  | +257%  |
| fastest                        | 8   | 73  | +6 wpm  | +517%  |
| cohesive                       | 19  | 89  | +6 wpm  | +216%  |
| premier                        | 1   | 61  | +6 wpm  | +3986% |
| immense                        | 8   | 71  | +6 wpm  | +500%  |
| ambitious                      | 6   | 62  | +5 wpm  | +592%  |
| overwhelming                   | 15  | 75  | +5 wpm  | +236%  |
| dismal                         | 2   | 54  | +5 wpm  | +1707% |
| revolutionary                  | 3   | 55  | +5 wpm  | +1129% |
| confident                      | 10  | 65  | +5 wpm  | +339%  |
| dedicated                      | 2   | 52  | +5 wpm  | +1643% |
| biggest                        | 3   | 50  | +4 wpm  | +1017% |
| dire                           | 1   | 46  | +4 wpm  | +2979% |
| nuanced <sup>a</sup>           | 0   | 43  | +4 wpm  | +2779% |
| intuitive                      | 4   | 48  | +4 wpm  | +704%  |
| tangible                       | 3   | 42  | +4 wpm  | +838%  |
| incredible <sup>a</sup>        | 0   | 36  | +3 wpm  | +894%  |
| daunting <sup>a</sup>          | 0   | 35  | +3 wpm  | +1115% |
| collegial <sup>a</sup>         | 0   | 32  | +3 wpm  | +782%  |
| interprofessional <sup>a</sup> | 0   | 32  | +3 wpm  | +868%  |
| deployable <sup>a</sup>        | 0   | 32  | +3 wpm  | +1150% |
| expansive                      | 1   | 32  | +3 wpm  | +2043% |
| groundbreaking <sup>a</sup>    | 0   | 25  | +2 wpm  | +655%  |
| prestigious <sup>a</sup>       | 0   | 24  | +2 wpm  | +562%  |
| stellar <sup>a</sup>           | 0   | 24  | +2 wpm  | +626%  |
| stark <sup>a</sup>             | 0   | 22  | +2 wpm  | +122%  |
| desperate <sup>a</sup>         | 0   | 22  | +2 wpm  | +565%  |
| careful                        | 188 | 100 | -17 wpm | -64%   |
| systematic                     | 489 | 520 | -19 wpm | -28%   |
| interesting                    | 217 | 87  | -22 wpm | -73%   |
| immediate                      | 559 | 579 | -24 wpm | -30%   |

|              |      |      |          |      |
|--------------|------|------|----------|------|
| ultimate     | 604  | 499  | -37 wpm  | -44% |
| considerable | 538  | 392  | -38 wpm  | -51% |
| detailed     | 1603 | 1086 | -121 wpm | -54% |
| important    | 5569 | 6695 | -147 wpm | -19% |
| major        | 5619 | 5557 | -261 wpm | -33% |

Abbreviations: wpm = words per million - number of words in 1985 = 7,185,061; number of words in 2020 = 10,662,335

<sup>a</sup>Adjective was absent in 1985 – percentage change calculated based on first year of occurrence

**eFigure.** Yearly Frequencies for All Hype Adjectives From 1985 to 2020 in Words per Million (wpm)

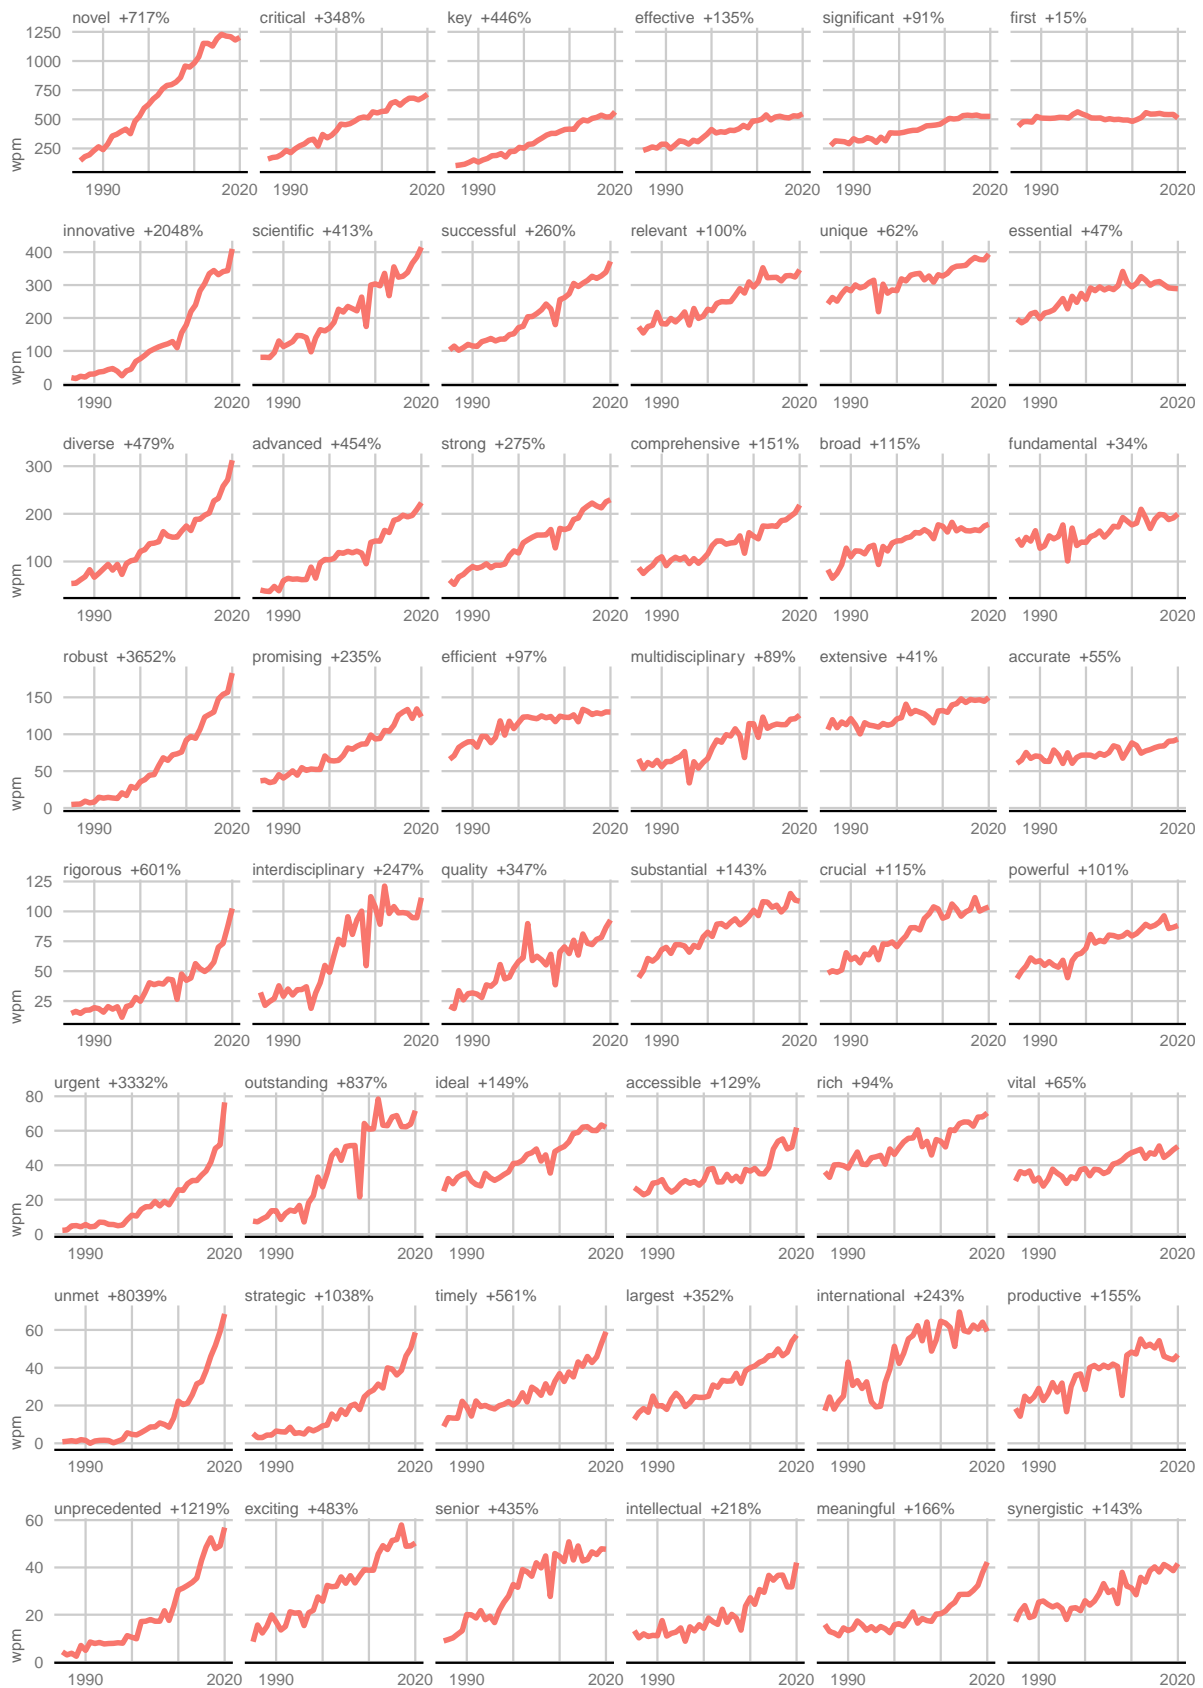

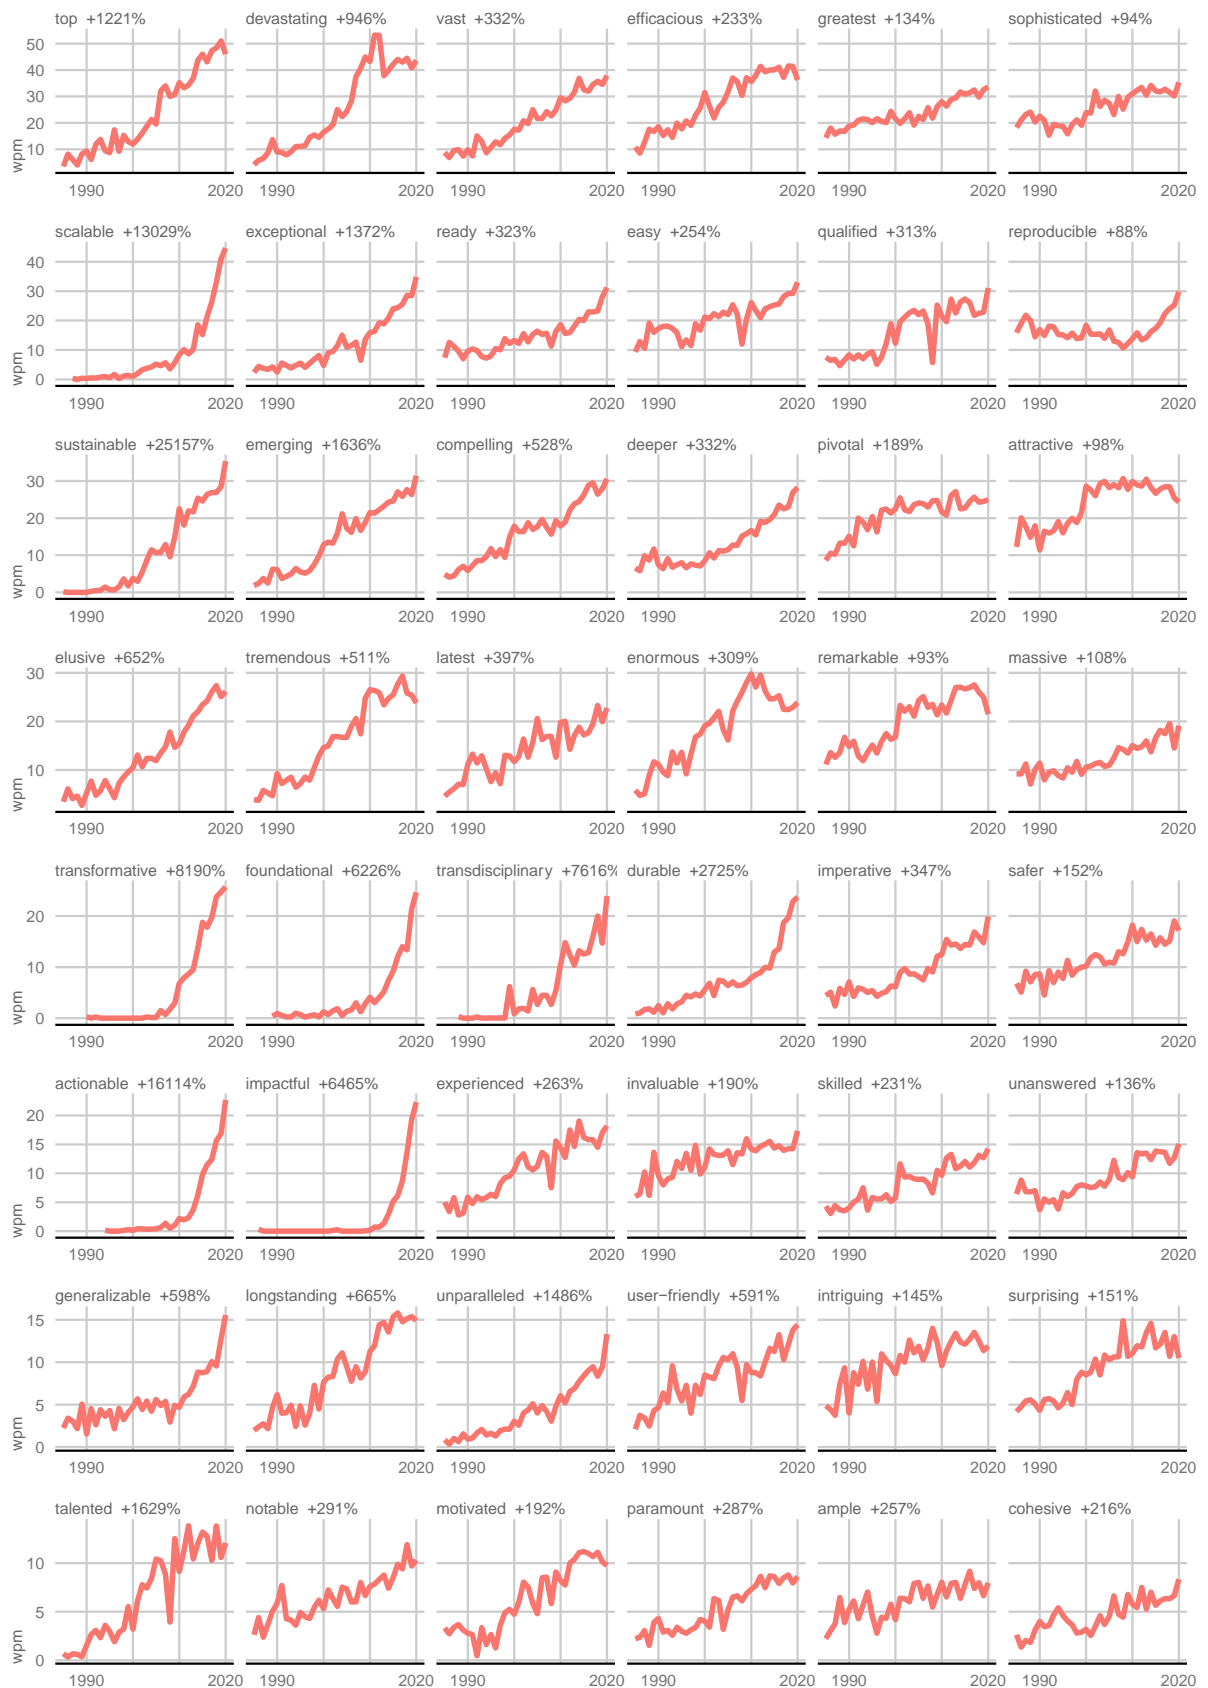

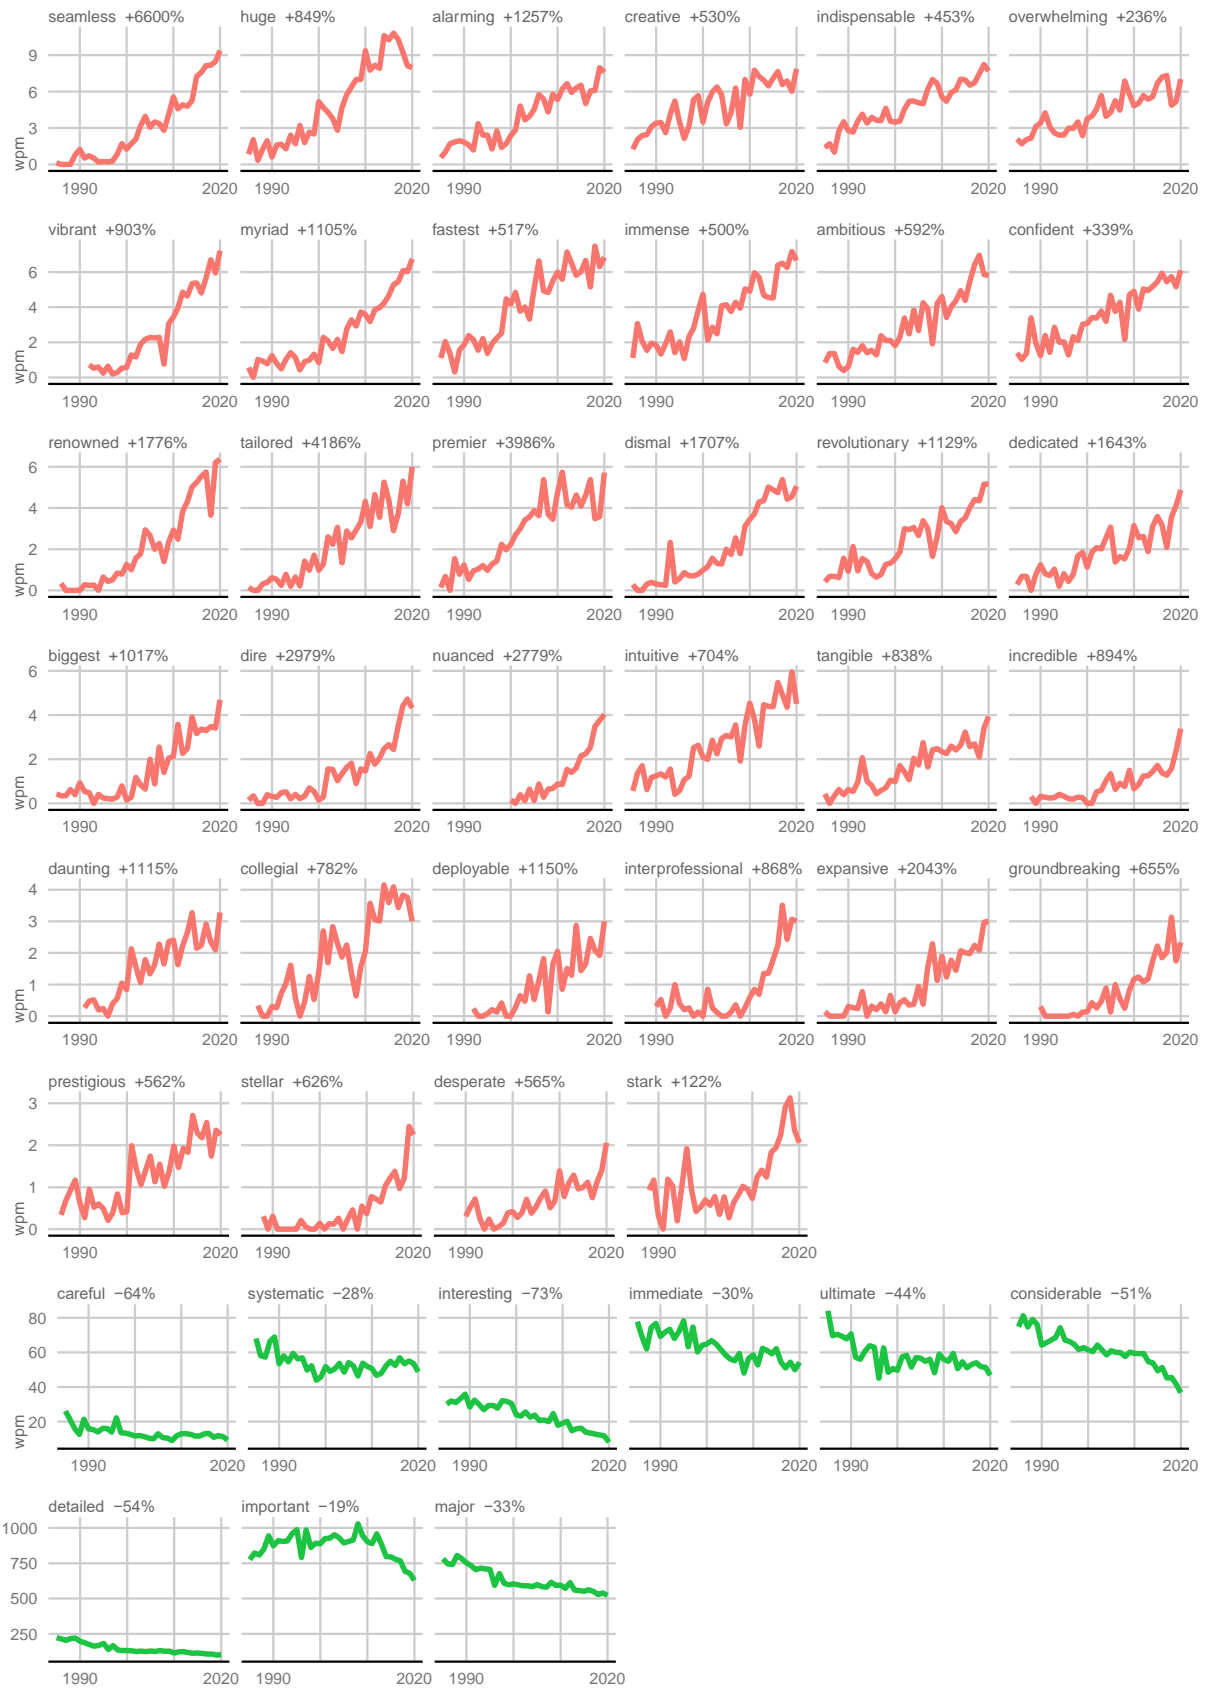

Abbreviations: wpm = words per million
